Distinct stages in the recognition, sorting and packaging of proTGF $\alpha$  into COPII coated transport vesicles

Pengcheng Zhang\* and Randy Schekman\*

\*Department of Molecular and Cell Biology and Howard Hughes Medical Institute, University of California, Berkeley, Berkeley, CA, 94720

Running Head: Cargo recruitment can't ensure packaging

Abbreviations: Cornichon (CNIH)

## Abstract

In addition to its role in forming vesicles from the endoplasmic reticulum (ER), the coat protein complex II (COPII) is also responsible for selecting specific cargo proteins to be packaged into COPII transport vesicles. Comparison of COPII vesicle formation in mammalian systems and in yeast suggested that the former employs more elaborate mechanisms for cargo recognition, presumably to cope with a significantly expanded repertoire of cargo that transits the secretory pathway. Using proTGF $\alpha$ , the transmembrane precursor of transforming growth factor alpha (TGF $\alpha$ ), as a model cargo protein, we demonstrate in cell-free assays that at least one auxiliary cytosolic factor is specifically required for the efficient packaging of proTGF $\alpha$  into COPII vesicles. Using a knockout HeLa cell line generated by CRISPR/Cas9, we provide functional evidence showing that a transmembrane protein, Cornichon-1 (CNIH), acts as a cargo receptor of proTGF $\alpha$ . We show that both CNIH and the auxiliary cytosolic factor(s) are required for efficient recruitment of proTGF $\alpha$  to the COPII coat *in vitro*. Moreover, we provide evidence that the recruitment of cargo protein by the COPII coat precedes and may be distinct from subsequent cargo packaging into COPII vesicles.

## Introduction

The endoplasmic reticulum (ER) is the entry point for newly synthesized proteins into the secretory pathway, and the coat protein complex II (COPII) is the membrane coat that is responsible for recruiting and transporting cargo from the ER via COPII vesicles. The COPII coat consists of five core components: The small GTPase Sar1, the Sec23/24 heterodimer, and the Sec13/31 heterotetramer. Cytosolic Sar1 is activated when it exchanges bound GDP for GTP, a process mediated by the guanine nucleotide exchange factor (GEF) Sec12, which is an ER resident protein (Nakano *et al.*, 1988; Barlowe and Schekman, 1993). Activated Sar1 extends an amphipathic N-terminal  $\alpha$ -helix and associates with the ER membrane, to which it recruits the Sec23/24 heterodimer, forming the pre-budding complex (Kuehn *et al.*, 1998; Huang *et al.*, 2001). After assembly of the pre-budding complex, the Sec13/31 heterotetramer is recruited to the ER where it polymerizes to guide membrane curvature and vesicle formation (Antonny *et al.*, 2001).

The selection and enrichment of COPII cargo proteins is achieved by interaction with the COPII coat, mainly via the Sec24 subunit (Miller *et al.*, 2002, 2003). In principle, transmembrane cargo proteins can interact directly with Sec24 via their cytoplasmic domains. Indeed this has been observed for a number of well characterized COPII cargo proteins (Mossessova *et al.*, 2003; Wendeler *et al.*, 2007). However, in the course of investigating the molecular requirements for COPII packaging of certain mammalian transmembrane proteins, we detected the involvement of one or more cytosolic factors in addition to the COPII coat.

Transforming growth factor alpha (TGF $\alpha$ ) was identified as a secreted peptide that had cell transforming properties. TGF $\alpha$  is synthesized as a small type I transmembrane protein with a short cytoplasmic C-terminus that has a PDZ binding motif (PBM) at the C-terminus. The N-terminal luminal domain contains glycosylation sites and an EGF-like domain. At the cell surface, proTGF $\alpha$  undergoes two sequential proteolytic cleavages that results in the release of the soluble TGF $\alpha$  ligand into the extracellular space (Singh and Coffey, 2014). Mutation of the terminal valine to glycine (V160G) was shown in multiple studies to significantly impede the ER export kinetics of proTGF $\alpha$  (Bosenberg *et al.*, 1992; Fernández-Larrea *et al.*, 1999; Ureña *et al.*, 1999). Using a cell-free reaction that reproduces the cargo-selective packaging of mammalian membrane cargo proteins into COPII vesicles, we probed the requirement for auxiliary cytosolic factors in the ER export of specific mammalian cargo.

## Results

### Evidence for Existence of Auxiliary Cytosolic Factors

Cytosol prepared from fresh rat livers was sufficient to support packaging of both pro/HA-TGF $\alpha$  and ERGIC53, a lectin that cycles between the ER and ERGIC component, into COPII vesicles made in a cell-free vesicle budding reaction (Figure 1A, lanes 3 & 4). Cytosol prepared from frozen rat livers (livers were flash-frozen in liquid nitrogen and then thawed slowly at 4°C), in contrast, was inactive in the budding reaction (Figure 1A, lanes 5 & 6). Purified COPII components supported the efficient packaging of ERGIC53, but not pro/HA-TGF $\alpha$  (Figure 1A, lane 7), suggesting the requirement of a cargo-selective cytosolic factor(s) for the packaging of the latter. Addition of freeze-thaw inactivated cytosol and purified COPII components restored the packaging of pro/HA-TGF $\alpha$  into COPII vesicles (Figure 1A, lanes 8-11). Thus, we speculated that the freeze-thaw treated cytosol may have lost COPII activity but retained an additional factor essential for the packaging of proTGF $\alpha$ .

Although cytosol prepared from frozen rat livers displayed minimal budding activity, it still contained significant amounts of the COPII subunits (Figure 1B, lanes 1 & 2). To rule out the possibility that the pro/HA-TGF $\alpha$ -specific packaging activity was due to the residual COPII components, proteins from the inactive cytosol were mixed with 30% ammonium sulfate under conditions where COPII proteins are precipitated (Kim *et al.*, 2005), which reduced COPII levels below the detection limit (Figure 1B, lane 4). Vesicle budding reactions supplemented with a dialyzed aliquot of the 30% supernatant fraction (30S) showed specific enhancement of pro/HA-

TGF $\alpha$  packaging (Figure 1C, compare lanes 3 & 5), indicating that the pro/HA-TGF $\alpha$ -specific activity was not attributable to known COPII components, but possibly to at least one auxiliary cytosolic factor specifically required in the packaging of pro/HA-TGF $\alpha$ . Notably, while ERGIC53 packaging was enhanced by total cytosol extract, the 30S cytosol fraction did not have an effect in this regard (Figure 1C, lanes 4 & 5).

Further experiments were conducted to confirm that the observed pro/HA-TGF $\alpha$  packaging activity was a COPII-dependent process. The 30S cytosol fraction was unable to support packaging of either ERGIC53 or pro/HA-TGF $\alpha$  in the absence of purified COPII (Figure 1D, lane 7). Supplementing purified COPII components with the 30S fraction greatly enhanced pro/HA-TGF $\alpha$  packaging efficiency (Figure 1D, lanes 9-11), and this activity was inhibited when Sar1A H79G, a dominant negative inhibitor of COPII budding *in vitro*, was included in the reaction (Figure 1D, lane 12), thus confirming that the pro/HA-TGF $\alpha$ -specific activity of the 30S fraction was dependent on COPII.

To test the physiological relevance of our *in vitro* observations, we examined the behavior of the V160G mutant form of proTGF $\alpha$ , which exhibited trafficking defects (Briley *et al.*, 1997). When tested in the *in vitro* budding assay, the pro/HA-TGF $\alpha$  V160G was packaged inefficiently into vesicles (Figure 1D, compare lane 15 and lanes 3 & 16). And as expected, supplementing purified COPII with the 30S cytosolic fraction resulted in inefficient packaging of pro/HA-TGF $\alpha$  V160G as well (Figure 1D, compare lanes 22 & 23 and lanes 10 & 11), thus the mutant behaved *in vitro* as it did *in vivo*.

The PDZ domain containing protein Syntenin-1 (Syn1) was previously identified as an interaction partner of proTGF $\alpha$ . Syn1 interacted with the wild type C-terminus of proTGF $\alpha$ , but not with the V160G mutant form. Hence it was proposed to function in the early steps of proTGF $\alpha$  trafficking (Fernández-Larrea *et al.*, 1999). In light of the observations above, we tested whether Syn1 acted as the auxiliary cytosolic factor. Purified recombinant Syn1 was supplemented to *in vitro* budding reactions, but no significant effect on pro/HA-TGF $\alpha$  budding was observed (Figure 1E). Thus our *in vitro* evidence does not support a role for Syn1 as the auxiliary factor. However, it is possible that the purified Syn1 is inactive, and our results do not rule out the possibility that Syn1 might act in coordination with other cytosolic factors.

#### Cornichon functions as a cargo receptor for proTGF $\alpha$

In HeLa cells, Cornichon-1 (hereafter referred to as Cornichon and abbreviated as CNIH for simplicity) was reported to interact with proTGF $\alpha$  in the ER (Castro *et al.*, 2007). A luminal loop of CNIH was shown to interact with the luminal EGF-like domain of proTGF $\alpha$  in the ER (Castro *et al.*, 2007). In *Drosophila*, Cornichon has been implicated in the ER export of Gurken (Roth *et al.*, 1995; Bökel *et al.*, 2006), a single-pass transmembrane protein that also contains an extracellular EGF-like domain. The Cornichon homolog in yeast, Erv14p, has been characterized to function as a cargo receptor for the ER export of Axl2p (Powers and Barlowe, 1998, 2002), among other client proteins (Nakanishi *et al.*, 2007; Herzig *et al.*, 2012).

CNIH has been proposed to perform a similar function *in vivo*, but there has been no functional characterization of its role in trafficking in mammalian cells. To ask whether CNIH might indeed play such a role, we generated a CNIH knockout (KO) cell line in HeLa cells using CRISPR/Cas9. Seven clones were expanded and analyzed for expression of CNIH (Figure 2A). Genomic sequencing confirmed that clone #3 was a bona fide genomic knockout of CNIH, and this cell line was used in subsequent experiments.

We first assessed the effect of CNIH KO on proTGF $\alpha$  trafficking. CNIH KO resulted in diminished budding efficiency of pro/HA-TGF $\alpha$ , but also resulted in diminished ERGIC53 budding efficiency (Figure 2, B-D). However, CNIH KO did not significantly affect the trafficking of Sec22, a SNARE protein, and Vangl2, a transmembrane protein involved in cell signaling (Figure 2, E-H), suggesting that CNIH KO did not result in general disruption of COPII

vesicle formation. Importantly, CNIH itself was also packaged very efficiently into COPII vesicles (Figure 2E). Together these data point to a role for CNIH in the ER export of proTGF $\alpha$ .

Reintroducing Cornichon into CNIH KO HeLa cells partially rescues proTGF $\alpha$  budding phenotype

To confirm that the proTGF $\alpha$  budding defects observed in CNIH KO membranes could be attributed to the absence of CNIH, rescue experiments were performed. Full-length human CNIH was put under control of a tetracycline inducible promoter and stably integrated into CNIH KO HeLa cells. A moderate level of CNIH expression was induced by addition of doxycycline (Figure 3E). Cells were then processed for use in the *in vitro* budding reactions.

In membranes prepared from wild type HeLa cells, pro/HA-TGF $\alpha$  was efficiently exported from the ER, as was CNIH (Figure 3A). In membranes prepared from CNIH KO cells, packaging of pro/HA-TGF $\alpha$  into COPII vesicles was significantly impaired (Figure 3C). When a moderate level of CNIH expression was reintroduced into CNIH KO cells (rescue), pro/HA-TGF $\alpha$  budding efficiency was significantly increased above KO levels, although not restored to WT levels (Figure 3, B and D).

The difference in proTGF $\alpha$  budding efficiency in wild type and rescue membranes may be attributed to the lower CNIH expression levels in the rescue cells. Higher expression levels of CNIH led to ER retention (Figure S1), thus making it challenging to approximate wild type levels of CNIH expression in CNIH KO cells. Despite this drawback, the efficiency of proTGF $\alpha$  budding showed a clear dependence on CNIH levels in the donor membranes (Fig. 3D).

Cytosol prepared from CNIH KO HeLa cells showed enhanced COPII activity

In the *in vitro* budding reactions, pro/HA-TGF $\alpha$  budding efficiency was significantly reduced in membranes prepared from CNIH KO HeLa cells (Figures 2 and 3). However, immunofluorescence microscopy showed no significant difference in steady state proTGF $\alpha$  localization in WT & CNIH KO cells. In addition, no significant difference in proTGF $\alpha$  trafficking kinetics was observed between WT & CNIH KO cells (data not shown).

Notably, the experiments in Figures 2 and 3 were done using HeLa cells as membrane source and rat liver cytosol as COPII source. The observations made *in vitro* and *in vivo* suggested the possibility of some compensatory effect attributable to the cytosolic protein content of CNIH KO HeLa cells as an explanation of this discrepancy.

To test this idea, cytosol was prepared from WT and CNIH KO HeLa cells and used in the *in vitro* budding reaction. As shown in Figure 4, cytosol prepared from CNIH KO cells displayed significantly higher COPII activity than that prepared from WT cells (Figure 4A). When incubated with CNIH KO membranes, cytosol prepared from CNIH KO cells significantly increased the budding efficiency of pro/HA-TGF $\alpha$  compared to WT cytosol (Figure 4B). Sec22 budding was also enhanced but to a lesser degree (Figure 4C).

Analysis of cytosolic protein content showed that the expression of Sec31A was increased in CNIH KO cells compared to WT, whereas Sec23A levels remained similar (Figure 4D). This observation also supports the idea that CNIH KO cells may have undergone adaptation in response to the loss of CNIH.

proTGF $\alpha$  recruitment to pre-budding complex requires cooperation of cytosolic factor(s) and CNIH

The apparent involvement of both a transmembrane cargo receptor and a cytosolic factor(s) in the ER export of proTGF $\alpha$  prompted us to investigate the mechanism of proTGF $\alpha$  recruitment to the pre-budding complex using the COPII recruitment assay, which allowed us to isolate the pre-budding complex and analyze its contents.

To confirm that the trafficking defect of pro/HA-TGF $\alpha$  V160G was not a result of defective binding to CNIH, coimmunoprecipitation experiments were performed and

demonstrated that pro/HA-TGF $\alpha$  V160G bound to CNIH as efficiently as wild type (Figure 5A, lanes 7 & 8).

HeLa cells were transiently transfected with plasmids encoding pro/HA-TGF $\alpha$  WT and membranes were harvested the next day for use in the COPII recruitment assay. The pre-budding complex was captured using GST-Sar1A-GTP-restricted mutant protein, and isolated by GST pulldown (For details, see Materials and Methods). When the pre-budding complex was assembled using purified Sec23A/24D heterodimer, pro/HA-TGF $\alpha$  was not recruited to the pre-budding complex (Figure 5B, lane 4). Supplementing the 30% supernatant fraction (30S) to the reaction resulted in recruitment of pro/HA-TGF $\alpha$  WT to the pre-budding complex, demonstrating the requirement of cytosolic factor(s) in this process (Figure 5B, lane 5). Notably, while pro/HA-TGF $\alpha$  was recruited to the pre-budding complex, Sec22 was not, indicating cargo specificity. HeLa cells were then transiently transfected with plasmids encoding pro/HA-TGF $\alpha$  V160G, and processed for use in the COPII recruitment assay. Interestingly, although the V160G mutant was defective for packaging into COPII vesicles, it was still recruited to the pre-budding complex in the presence of purified Sec23A/24D and the 30S fraction (Figure 5C, lane 5). Finally, HeLa CNIH KO cells were transiently transfected with plasmids encoding pro/HA-TGF $\alpha$  WT and processed for use in the COPII recruitment assay. Removal of CNIH from HeLa membranes prevented pro/HA-TGF $\alpha$  WT from being recruited to the pre-budding complex (Figure 5D, lane 5). As a control, the impact of CNIH KO on Sec22 recruitment was analyzed. Whereas supplementing the 30S fraction to purified Sec23A/24D did not support Sec22 recruitment to the pre-budding complex, supplementing total rat liver cytosol did (Figure 5E, lane 5). This can be explained by the fact that Sec22 specifically interacts with isoforms A & B of Sec24 (Mancias and Goldberg, 2008). Total rat liver cytosol contained all four Sec24 isoforms, and thus was able to support Sec22 recruitment to the pre-budding complex. In contrast, the 30S fraction did not contain Sec24, and thus Sec22 was not recruited to the pre-budding complex. More importantly, CNIH KO did not affect Sec22 recruitment to the pre-budding complex, supporting a specific role for CNIH in proTGF $\alpha$  recruitment (Figure 5E, lane 10).

## Discussion

In vertebrates, there are four homologs of Cornichon: CNIH-1, 2, 3, & 4. CNIH-2 and CNIH-3 was shown to play a role in regulating the subunit composition of AMPA receptors, presumably by regulating trafficking of the receptor components from the ER (Kato *et al.*, 2010; Herring *et al.*, 2013). CNIH-4 was shown to play a role in the ER export of G protein coupled receptors (GPCRs) in HeLa cells (Sauvageau *et al.*, 2014). These observations suggest that Cornichon homologs play an evolutionarily conserved role as cargo receptors in ER export. However, overexpression of CNIH in HeLa cells increases the retention of proTGF $\alpha$  in the ER (Castro *et al.*, 2007). This may be explained by our observation that overexpression of CNIH results in its ER retention, which in turn traps proTGF $\alpha$  in the ER (Figure S1). By analogy, this may also explain the observation that CNIH-4 overexpression in HeLa cells similarly results in the ER retention of GPCRs (Sauvageau *et al.*, 2014).

We show that the efficient recruitment and packaging of proTGF $\alpha$  requires the cooperation of CNIH with one or more cytosolic factors. The yeast homolog, Erv14p, is required for the ER export of the transmembrane protein Yor1p, even though Yor1p interacts directly with Sec24p. The requirement of dual ER export signals is known for other Erv14p client proteins as well, suggesting that this phenomenon was not restricted to Yor1p (Pagant *et al.*, 2015). Our observations suggest that this may also be the case for CNIH client proteins in mammals. This may be due to the weak and transient nature of interactions between cargo and coats, which requires multiple sites of interaction to stabilize the pre-budding complex for efficient incorporation into COPII vesicles.

Notably, the V160G mutant form of proTGF $\alpha$ , although packaged inefficiently into COPII vesicles, is recruited normally to the pre-budding complex when CNIH and the cytosolic



factor(s) are present. This shows that efficient recruitment of cargo to the pre-budding complex does not guarantee efficient cargo packaging into COPII vesicles, suggesting that cargo recruitment and cargo packaging are distinct processes.

Also noteworthy is the lack of correlation between cargo recruitment and budding efficiency. In the *in vitro* budding reactions, ERGIC53 was very efficiently packaged into COPII vesicles. However, it was undetectable in the COPII binding assays (data not shown). In contrast, Sec22 was also very efficiently packaged into COPII vesicles, while detected at reasonable levels in the COPII binding assays (Figure 5E). This may be explained by the stable association of Sec22 with Sec23/24 upon formation of a fusogenic SNARE complex with Bos1 & Sed5, as shown with yeast proteins (Sato and Nakano, 2005). The apparently different binding affinities of two efficiently packaged cargo proteins to the pre-budding complex again supports the notion that cargo recruitment and cargo packaging are two distinct events in the process of COPII vesicle formation.

Pre-budding complexes are maintained in a highly dynamic manner. Interaction between Sec24 and cargo persists even after Sar1 hydrolyzes its bound GTP, whereas Sec12 activity dynamically maintains the interaction between Sec24 and cargo, presumably by reloading Sar1 with GTP (Sato and Nakano, 2005). This suggests that multiple rounds of GTP hydrolysis by Sar1 may be required for productive packaging of cargo into COPII vesicles. The established methods used to isolate pre-budding complexes utilize either non-hydrolyzable GTP analogs or GTPase defective Sar1 mutants, and thus are unable to capture the dynamic nature of this assembly intermediate and may explain the extremely low efficiency of its recovery (Aridor *et al.*, 1998; Kuehn *et al.*, 1998).

The selection of appropriate cargo proteins to include into nascent vesicles is a critical function of the COPII coat, in addition to its role in vesicle formation. This is the fundamental mechanism to ensure proper functioning of the eukaryotic endomembrane system, and by extension, to ensure cell viability. During the course of evolution, novel mechanisms may have emerged to cope with the expanding repertoire of cargo proteins that pass through the endomembrane system. New methods are needed to capture the transient and dynamic nature of cargo recruitment and packaging. The identification and characterization of the auxiliary cytosolic factor(s) required for efficient COPII packaging of proTGF $\alpha$  will also provide important information to help elucidate the molecular mechanisms for cargo recognition and packaging in mammalian cells.

## Materials and Methods:

### Antibodies

Anti-Sec13 and anti-Sec22 sera were prepared as previously described (Merte *et al.*, 2010). Anti-Sec31A was from BD Transduction Laboratories (San Jose, CA) (612350). Anti-Sec23A, anti-Sar1A/B and anti-ERGIC53 sera were prepared as previously described (Fromme *et al.*, 2007). Anti-ribophorin I serum was provided by Peter Walter (UCSF). Rabbit anti-HA monoclonal antibody was from Cell Signaling (Danvers, MA) (C29F4). Anti-CNIH was from Sigma (St. Louis, MO) (SAB1304796). Anti-mouse and anti-rabbit HRP conjugates were from GE Healthcare (Buckinghamshire, UK) (NXA931 and NA934V, respectively).

### Preparation of rat liver cytosol

Where indicated, rat livers were preserved by flash freezing with liquid N<sub>2</sub> and stored at -80°C. Frozen livers were then thawed in 400ml PBS at 4°C. Fresh livers were used unless otherwise indicated. Rat liver cytosol was prepared in Buffer E as described (Kim *et al.*, 2005), typically at a protein concentration of 30-40 mg ml<sup>-1</sup>.

### Preparation of HeLa cytosol

Wild type or CNIH knockout HeLa cells were grown in ten 150mm plates to 90% confluency, washed with PBS, and collected using a cell scraper into 10ml B88 buffer containing 1x protease inhibitors (PI). Cells were rendered permeable by exposure to  $80\mu\text{g ml}^{-1}$  digitonin in B88 with PI for 30min at  $4^{\circ}\text{C}$  with gentle rocking. Bio-Beads SM-2 (2g) (Bio-Rad) resin were hydrated and washed with 35ml B88 buffer. Permeabilized cells were centrifuged at 300 g for 5min at  $4^{\circ}\text{C}$ , and the supernatant (10ml) was collected and incubated with Bio-Beads overnight at  $4^{\circ}\text{C}$  with gentle rocking to remove cell debris and digitonin. Bio-Beads were subsequently removed by centrifugation at 300 g for 5min at  $4^{\circ}\text{C}$ . The resulting supernatant was further centrifuged at 135,000 g for 30min at  $4^{\circ}\text{C}$  to remove remaining insoluble material or protein aggregates. The supernatant was then transferred to Amicon tubes and concentrated to a final volume of  $\sim 500\mu\text{l}$ . Protein concentration was then measured and the final cytosol was distributed into aliquots, flash frozen, and stored at  $-80^{\circ}\text{C}$ .

#### Preparation of permeabilized cells

Procedure for preparing permeabilized cells and subsequent *in vitro* translation was performed as previously described (Merte *et al.*, 2010), with slight modifications. In detail, HeLa cells were grown in a 100mm dish to 90% confluency, washed with 5ml PBS, trypsinized at RT for 5min, and washed again in 6ml KHM buffer containing  $10\mu\text{g ml}^{-1}$  soybean trypsin inhibitor. Cells were then permeabilized in  $40\mu\text{g ml}^{-1}$  digitonin for 5min in 6ml ice cold KHM buffer. Permeabilized cells were then washed once with B88-LiCl buffer, once in B88 buffer, and finally resuspended in B88 buffer such that the optical density (at 600nm) of membranes in B88 buffer was 0.750. The resuspension was aliquoted and stored at  $-80^{\circ}\text{C}$ .

For use in *in vitro* translation, semi-intact cells were washed once in KHM buffer after permeabilization with digitonin and resuspended in  $100\mu\text{l}$  KHM buffer.

#### *In vitro* translation

*In vitro* translation was performed as previously described (Merte *et al.*, 2010), with slight modifications. In detail,  $1\text{mM CaCl}_2$  and  $10\mu\text{g ml}^{-1}$  micrococcal nuclease were added to  $100\mu\text{l}$  of permeabilized cells prepared as described above to remove endogenous RNA. After incubation at room temperature for 12min,  $4\text{mM EGTA}$  was then added to terminate the reaction. Membranes were then centrifuged at 10,000 g at  $4^{\circ}\text{C}$  for 15s, and resuspended in KHM buffer such that the optical density (at 600nm) of  $5\mu\text{l}$  membranes in  $500\mu\text{l}$  KHM buffer was 0.060. These membranes were added to *in vitro* translation reactions containing rabbit reticulocyte lysate (Promega, Flexi), amino acids, KCl, and mRNA encoding HA-Vangl2, which was incubated at  $30^{\circ}\text{C}$  for 60min (details as in Merte *et al.*, 2010). Donor membranes were centrifuged at 2,700 g at  $4^{\circ}\text{C}$  for 3min, and resuspended with 1ml B88-LiCl buffer. Donor membranes were then washed twice with B88 buffer, and resuspended in  $20\mu\text{l}$  B88 buffer per reaction.

#### *In vitro* COPII vesicle budding assay

Vesicle formation and purification was performed as described previously (Kim *et al.*, 2005), with slight modifications. In detail, donor membranes were incubated where indicated with rat liver cytosol ( $2\text{ mg ml}^{-1}$ ), recombinant COPII proteins ( $10\text{ ng }\mu\text{l}^{-1}$  Sar1A,  $10\text{ ng }\mu\text{l}^{-1}$  Sec23A/24D,  $10\text{ ng }\mu\text{l}^{-1}$  Sec13/31A), ATP regeneration system,  $0.3\text{mM GTP}$ , and Sar1A H79G ( $10\text{ ng }\mu\text{l}^{-1}$ ) in a final volume of  $100\mu\text{l}$ . The reaction was carried out at  $30^{\circ}\text{C}$  for 1h, and terminated by incubation on ice for 5min. Donor membranes were removed by centrifugation at 14,000 g for 12min at  $4^{\circ}\text{C}$ . The resulting supernatant was centrifuged at 115,000 g for 25min at  $4^{\circ}\text{C}$  to collect COPII vesicles. Vesicle pellets were then resuspended in  $15\mu\text{l}$  of Buffer C and Laemmli sample buffer and heated at  $55^{\circ}\text{C}$  for 15min. Vesicle samples and original donor membrane samples were resolved by SDS-PAGE, transferred on to PVDF membranes, and subjected to immunoblotting to detect various ER resident proteins and COPII cargo proteins.



### COPII recruitment assay

The membrane recruitment of COPII components using recombinant Sar1A-GTP-restricted mutant was performed as previously described (Aridor *et al.*, 1995), with modifications. In detail, donor membranes were mixed where indicated with rat liver cytosol (2 mg ml<sup>-1</sup>), recombinant COPII components (20 ng μl<sup>-1</sup> Sec23A/24D), ATP regeneration system, 1mM GTP, and GST-Sar1A-GTP-restricted mutant protein (30 ng μl<sup>-1</sup>) in a total volume of 100μl. The mixture was incubated at 30°C for 30min, after which the reaction was terminated by transfer to ice. Membranes were collected by centrifugation at 20,000 g for 10min at 4°C. The supernatant was discarded, and membranes were dissolved by incubation with 1ml of solubilization buffer (20mM HEPES, pH 7.2, 1mM magnesium acetate, 1% digitonin) on ice for 30min, with occasional mixing. Insoluble material was removed by centrifugation at 163,000 g for 30min at 4°C. The resulting supernatant was then incubated with glutathione agarose beads (Pierce, Waltham, MA) at 4°C for 30min with rotational rocking. Subsequently, the beads were collected by centrifugation (200 g) and washed three times with 200μl solubilization buffer. Beads were eluted by heating in Laemmli sample buffer at 55°C for 15min. Samples were resolved by SDS-PAGE, transferred on to PVDF membranes, and subjected to immunoblotting to detect various ER resident proteins, COPII cargo proteins, and Sec23A.

### Purification of Recombinant Proteins

Purification of human Sar1A WT & H79G was performed as described (Kim *et al.*, 2005). Purification of human GST-Sar1A-GTP-restricted form was performed as described (Kim *et al.*, 2005), with modification. Briefly, instead of thrombin cleavage, the GST-tagged recombinant protein was directly eluted with 5mM glutathione in PBS buffer, dialyzed overnight in HKM-G buffer, distributed into aliquots, flash frozen in liquid N<sub>2</sub>, and stored at -80°C. Purification of human FLAG-Sec23A/His-Sec24D was performed according to previously described procedures (Kim *et al.*, 2005).

### Immunoprecipitation

HeLa cells grown in 10cm plates were transiently transfected with 2μg of plasmids encoding pro/HA-TGFα wild type or V160G mutant, or HA-Vangl2, using Lipofectamine 2000 according to the manufacturer's recommended protocol. Twenty-four hours later, cells were washed twice in PBS. Cells were then solubilized in 1ml of IP lysis buffer (20mM Tris-HCl, pH 7.4, 150mM NaCl, 1mM EDTA, 0.5% Triton X-100, 1x Protease Inhibitors) on ice for 15min. Cell lysates were cleared by centrifuging at 20,817 g for 15min at 4°C. An aliquot (10μl) of the supernatant fraction was reserved in a separate tube and mixed with Laemmli sample buffer. An aliquot (30μl) of 50% monoclonal anti-HA-agarose (Sigma-Aldrich) slurry was washed three times with IP lysis buffer and added to cleared cell lysates and incubated at 4°C for 1h. The monoclonal anti-HA-agarose beads were centrifuged at 200 g and washed three times with IP lysis buffer. The beads were then resuspended in 15μl 1x Laemmli sample buffer, heated to 55°C for 15min, and samples were resolved by SDS-PAGE, transferred onto PVDF membranes and subjected to immunoblotting.

### Acknowledgements

We thank Lixon Wang, Lazar Dimitrov, and Kartoosh Heydari for their assistance in preparing CNIH KO HeLa cells. We thank Ann Fisher at the Berkeley Tissue Culture Facility for assistance with cell culture.

### References

Antonny, B., Madden, D., Hamamoto, S., Orci, L., and Schekman, R. (2001). Dynamics of the COPII coat with GTP and stable analogues. *Nat. Cell Biol.* 3, 531–537.

- Aridor, M., Bannykh, S. I., Rowe, T., and Balch, W. E. (1995). Sequential coupling between COPII and COPI vesicle coats in endoplasmic reticulum to Golgi transport. *J. Cell Biol.* *131*, 875–893.
- Aridor, M., Weissman, J., Bannykh, S., Nuoffer, C., and Balch, W. E. (1998). Cargo selection by the COPII budding machinery during export from the ER. *J. Cell Biol.* *141*, 61–70.
- Barlowe, C., and Schekman, R. (1993). SEC12 encodes a guanine-nucleotide-exchange factor essential for transport vesicle budding from the ER. *Nature* *365*, 347–349.
- Bosenberg, M. W., Pandiella, A., and Massagué, J. (1992). The cytoplasmic carboxy-terminal amino acid specifies cleavage of membrane TGF alpha into soluble growth factor. *Cell* *71*, 1157–1165.
- Bökel, C., Dass, S., Wilsch-Bräuninger, M., and Roth, S. (2006). Drosophila Cornichon acts as cargo receptor for ER export of the TGFalpha-like growth factor Gurken. *Development* *133*, 459–470.
- Castro, C. P., Piscopo, D., Nakagawa, T., and Derynck, R. (2007). Cornichon regulates transport and secretion of TGFalpha-related proteins in metazoan cells. *J. Cell. Sci.* *120*, 2454–2466.
- Fernández-Larrea, J., Merlos-Suárez, A., Ureña, J. M., Baselga, J., and Arribas, J. (1999). A role for a PDZ protein in the early secretory pathway for the targeting of proTGF-alpha to the cell surface. *Mol. Cell* *3*, 423–433.
- Fromme, J. C., Ravazzola, M., Hamamoto, S., Al-Balwi, M., Eyaid, W., Boyadjiev, S. A., Cosson, P., Schekman, R., and Orci, L. (2007). The genetic basis of a craniofacial disease provides insight into COPII coat assembly. *Dev. Cell* *13*, 623–634.
- Herring, B. E., Shi, Y., Suh, Y. H., Zheng, C.-Y. Y., Blankenship, S. M., Roche, K. W., and Nicoll, R. A. (2013). Cornichon proteins determine the subunit composition of synaptic AMPA receptors. *Neuron* *77*, 1083–1096.
- Herzig, Y., Sharpe, H. J., Elbaz, Y., Munro, S., and Schuldiner, M. (2012). A systematic approach to pair secretory cargo receptors with their cargo suggests a mechanism for cargo selection by Erv14. *PLoS Biol.* *10*, e1001329.
- Huang, M., Weissman, J. T., Beraud-Dufour, S., Luan, P., Wang, C., Chen, W., Aridor, M., Wilson, I. A., and Balch, W. E. (2001). Crystal structure of Sar1-GDP at 1.7 Å resolution and the role of the NH2 terminus in ER export. *J. Cell Biol.* *155*, 937–948.
- Kato, A. S. *et al.* (2010). Hippocampal AMPA receptor gating controlled by both TARP and cornichon proteins. *Neuron* *68*, 1082–1096.
- Kim, J., Hamamoto, S., Ravazzola, M., Orci, L., and Schekman, R. (2005). Uncoupled packaging of amyloid precursor protein and presenilin 1 into coat protein complex II vesicles. *J. Biol. Chem.* *280*, 7758–7768.
- Kuehn, M. J., Herrmann, J. M., and Schekman, R. (1998). COPII-cargo interactions direct protein sorting into ER-derived transport vesicles. *Nature* *391*, 187–190.
- Mancias, J. D., and Goldberg, J. (2008). Structural basis of cargo membrane protein discrimination by the human COPII coat machinery. *EMBO J.* *27*, 2918–2928.
- Merte, J., Jensen, D., Wright, K., Sarsfield, S., Wang, Y., Schekman, R., and Ginty, D. D. (2010). Sec24b selectively sorts Vangl2 to regulate planar cell polarity during neural tube closure. *Nat. Cell Biol.* *12*, 41–6; sup pp 1–8.
- Miller, E. A., Beilharz, T. H., Malkus, P. N., Lee, M. C., Hamamoto, S., Orci, L., and Schekman, R. (2003). Multiple cargo binding sites on the COPII subunit Sec24p ensure capture of diverse membrane proteins into transport vesicles. *Cell* *114*, 497–509.
- Miller, E., Antonny, B., Hamamoto, S., and Schekman, R. (2002). Cargo selection into COPII vesicles is driven by the Sec24p subunit. *EMBO J.* *21*, 6105–6113.
- Mossessova, E., Bickford, L. C., and Goldberg, J. (2003). SNARE selectivity of the COPII coat. *Cell* *114*, 483–495.
- Nakanishi, H., Suda, Y., and Neiman, A. M. (2007). Erv14 family cargo receptors are necessary for ER exit during sporulation in *Saccharomyces cerevisiae*. *J. Cell. Sci.* *120*, 908–916.

- Nakano, A., Brada, D., and Schekman, R. (1988). A membrane glycoprotein, Sec12p, required for protein transport from the endoplasmic reticulum to the Golgi apparatus in yeast. *J. Cell Biol.* *107*, 851–863.
- Pagant, S., Wu, A., Edwards, S., Diehl, F., and Miller, E. A. (2015). Sec24 is a coincidence detector that simultaneously binds two signals to drive ER export. *Curr. Biol.* *25*, 403–412.
- Powers, J., and Barlowe, C. (1998). Transport of axl2p depends on erv14p, an ER-vesicle protein related to the *Drosophila* cornichon gene product. *J. Cell Biol.* *142*, 1209–1222.
- Powers, J., and Barlowe, C. (2002). Erv14p directs a transmembrane secretory protein into COPII-coated transport vesicles. *Molecular Biology of the Cell* *13*, 880–891.
- Roth, S., Neuman-Silberberg, F. S., Barcelo, G., and Schüpbach, T. (1995). cornichon and the EGF receptor signaling process are necessary for both anterior-posterior and dorsal-ventral pattern formation in *Drosophila*. *Cell* *81*, 967–978.
- Sato, K., and Nakano, A. (2005). Dissection of COPII subunit-cargo assembly and disassembly kinetics during Sar1p-GTP hydrolysis. *Nat. Struct. Mol. Biol.* *12*, 167–174.
- Sauvageau, E., Rochdi, M. D., Oueslati, M., Hamdan, F. F., Percherancier, Y., Simpson, J. C., Pepperkok, R., and Bouvier, M. (2014). CNIH4 interacts with newly synthesized GPCR and controls their export from the endoplasmic reticulum. *Traffic* *15*, 383–400.
- Singh, B., and Coffey, R. J. (2014). From wavy hair to naked proteins: the role of transforming growth factor alpha in health and disease. *Semin. Cell Dev. Biol.* *28*, 12–21.
- Ureña, J. M., Merlos-Suárez, A., Baselga, J., and Arribas, J. (1999). The cytoplasmic carboxy-terminal amino acid determines the subcellular localization of proTGF-(alpha) and membrane type matrix metalloprotease (MT1-MMP). *J. Cell. Sci.* *112* ( Pt 6), 773–784.
- Wendeler, M. W., Paccaud, J.-P. P., and Hauri, H.-P. P. (2007). Role of Sec24 isoforms in selective export of membrane proteins from the endoplasmic reticulum. *EMBO Rep.* *8*, 258–264.

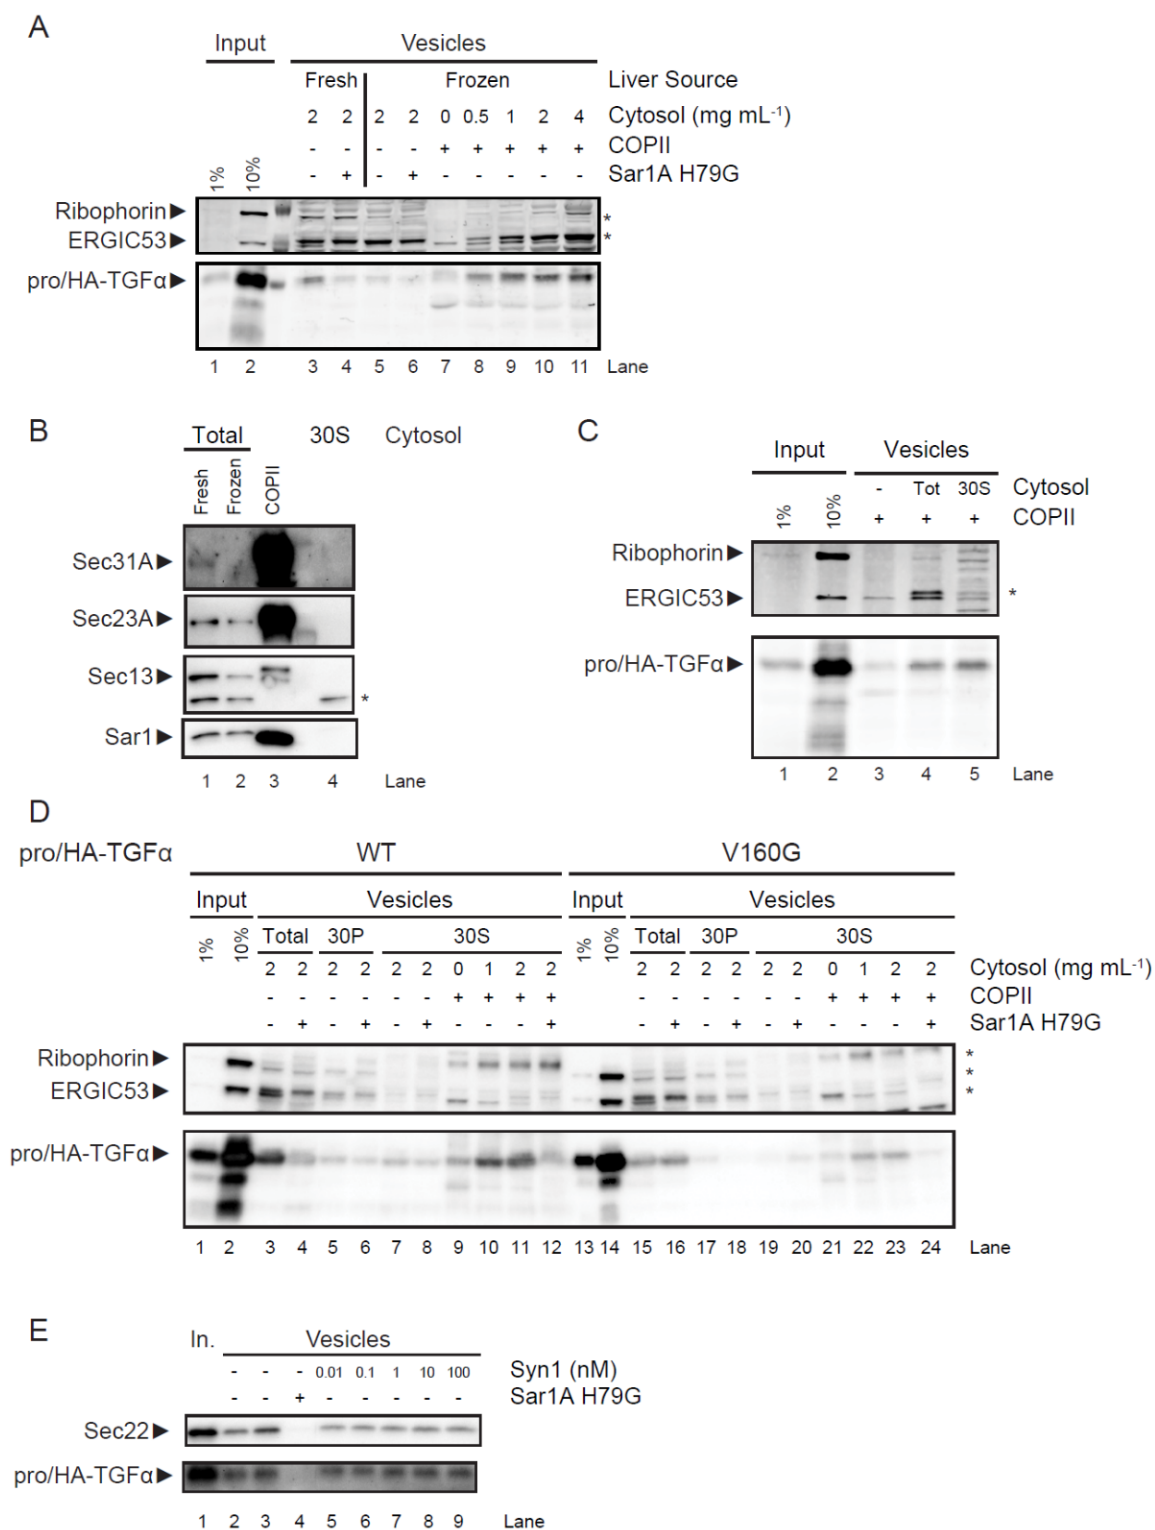

**Figure 1.** ProTGFα requires an auxiliary cytosolic factor for efficient COPII packaging. HeLa cells were transfected with plasmids expressing pro/HA-TGFα and membranes were harvested the next day for use in *in vitro* budding reactions. (A) LiCor scan of *in vitro* budding reaction. Rat liver cytosol was prepared from fresh or frozen rat livers as indicated. Sar1A H79G is a GTPase mutant that is a dominant negative inhibitor of *in vitro* budding. (B) Immunoblot of various

cytosol fractions and purified COPII samples. (C) LiCor scan of *in vitro* budding reaction. (D and E) Immunoblots of *in vitro* budding reactions. Tot: Total cytosol extract. 30P: Pellet fraction of cytosol after 30% ammonium sulfate precipitation. 30S: Supernatant fraction of cytosol after 30% ammonium sulfate precipitation. SynI: Purified recombinant human Syntenin-1. Asterisks: Unrelated bands.



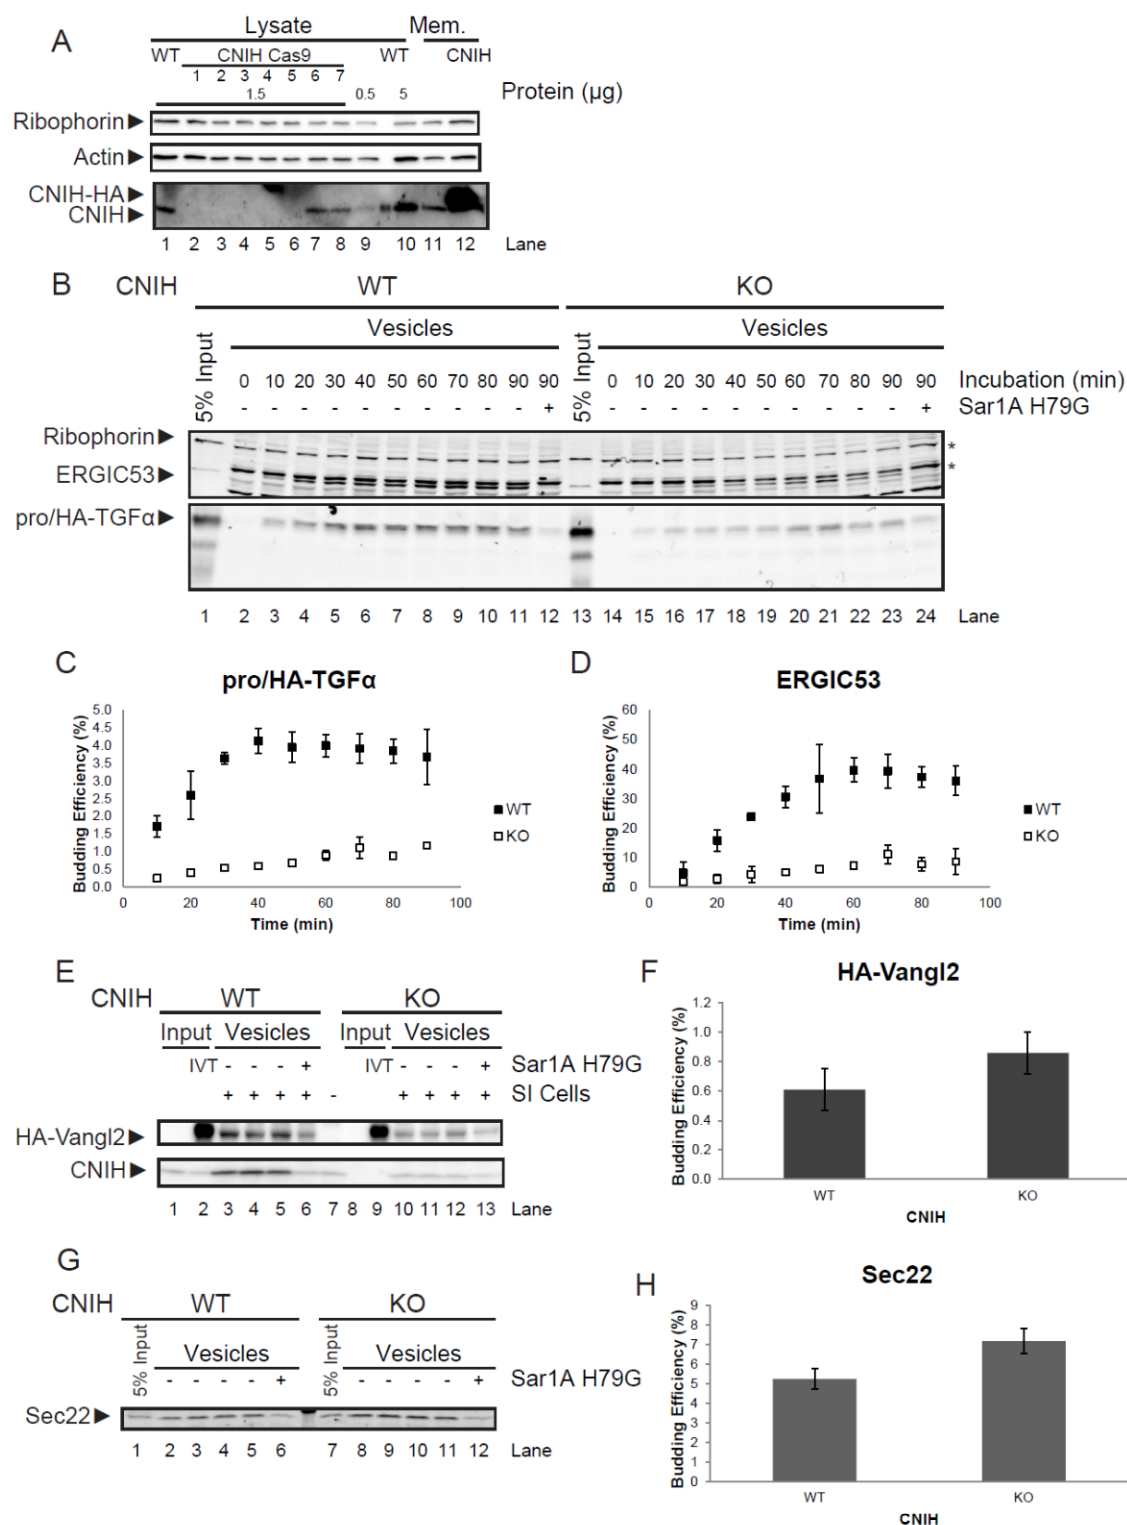

**Figure 2.** Loss of CNIH impairs ER export of proTGF $\alpha$ . (A) Immunoblot of HeLa cell samples. Lysate: Total cell lysate. Mem.: Membranes from permeabilized cells. WT: Wild type. CNIH Cas9: Cells that have been treated for modification at the CNIH locus by CRISPR/Cas9. CNIH: HeLa cells transiently transfected with a plasmid expressing CNIH-HA. (B) LiCor scan of an *in vitro* budding reaction. (C and D) Quantification of budding efficiency of pro/HA-TGF $\alpha$  (C) and ERGIC53 (D). (E and G) Immunoblot (E) and LiCor scan (G) of *in vitro* budding reactions. (F

and H) Quantification of budding efficiency of HA-Vangl2 (F) and Sec22 (H). Quantifications are represented as mean $\pm$ SEM ( $p>0.05$  in both cases).

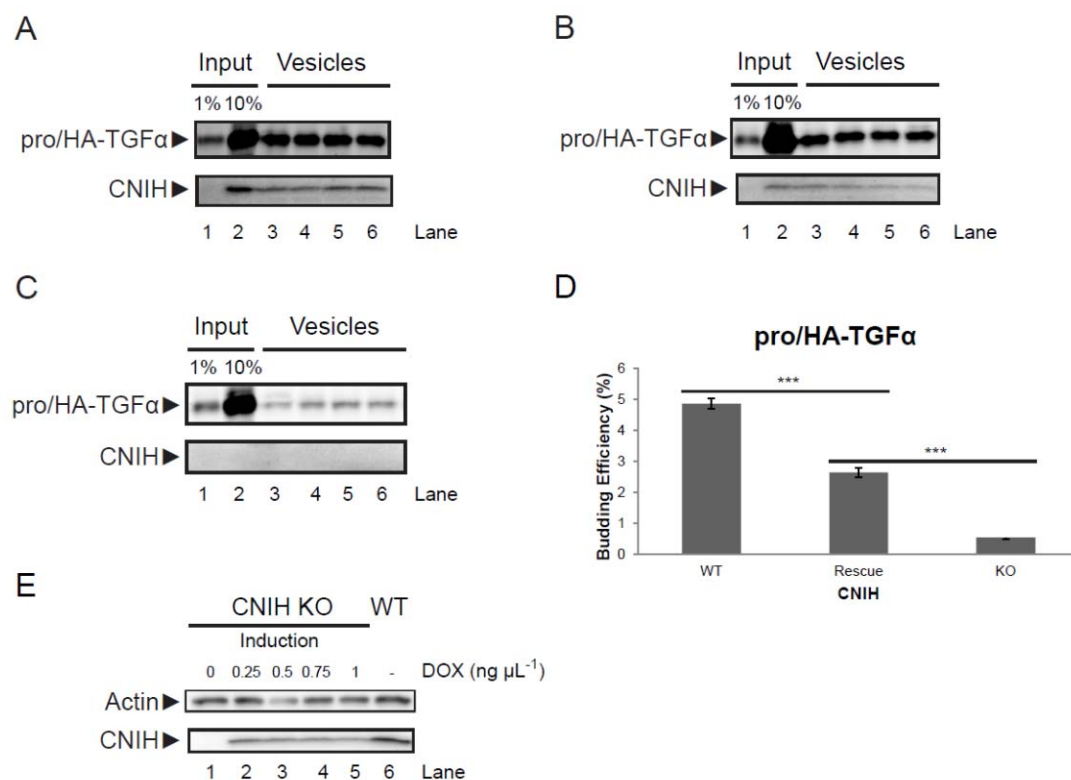

**Figure 3.** Expression of CNIH in CNIH KO HeLa cells partially rescues proTGF $\alpha$  budding phenotype. (A-C) *In vitro* budding reactions. CNIH was detected using immunoblotting whereas pro/HA-TGF $\alpha$  was detected using LiCor. Membranes were prepared from: wild type HeLa cells expressing pro/HA-TGF $\alpha$  (A), CNIH KO HeLa cells expressing pro/HA-TGF $\alpha$  & CNIH (rescue) (B), or CNIH KO HeLa cells expressing pro/HA-TGF $\alpha$  (C). (D) Quantification of proTGF $\alpha$  budding efficiency. Results are represented as mean $\pm$ SEM (\*\*\*:  $p < 0.001$ ). (E) Immunoblot showing the induction of CNIH expression. Cells were treated with indicated amounts of doxycycline for 24h, and then lysates were harvested for analysis. Cells used in (B) were treated with 1 ng  $\mu\text{L}^{-1}$  doxycycline for 24h. DOX: doxycycline.

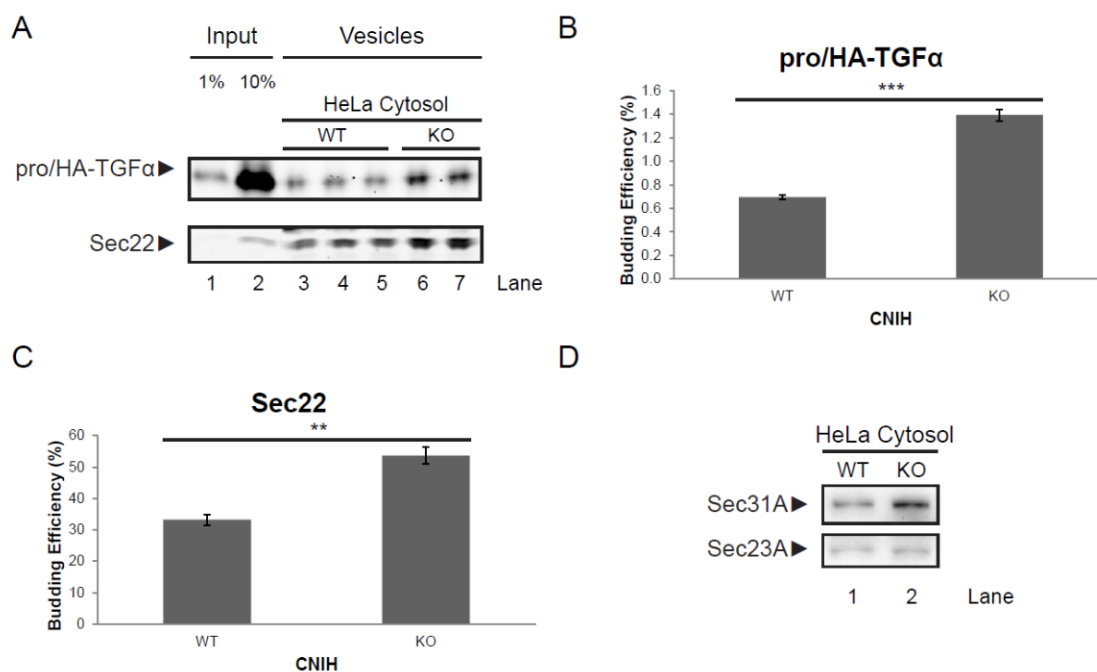

**Figure 4.** Cytosol from CNIH KO HeLa cells displays higher COPII activity *in vitro*. (A) LiCor scan of an *in vitro* budding reaction. Membranes prepared from CNIH KO HeLa cells were incubated with cytosol prepared from wild type (WT) or CNIH KO (KO) HeLa cells as indicated. (B and C) Quantification of budding efficiency of pro/HA-TGFα (B) and Sec22 (C). Quantifications are represented as mean±SEM (\*\*\*: p<0.001; \*\*: p<0.01). (D) Immunoblot of cytosol prepared from wild type (WT) or CNIH KO (KO) HeLa cells.

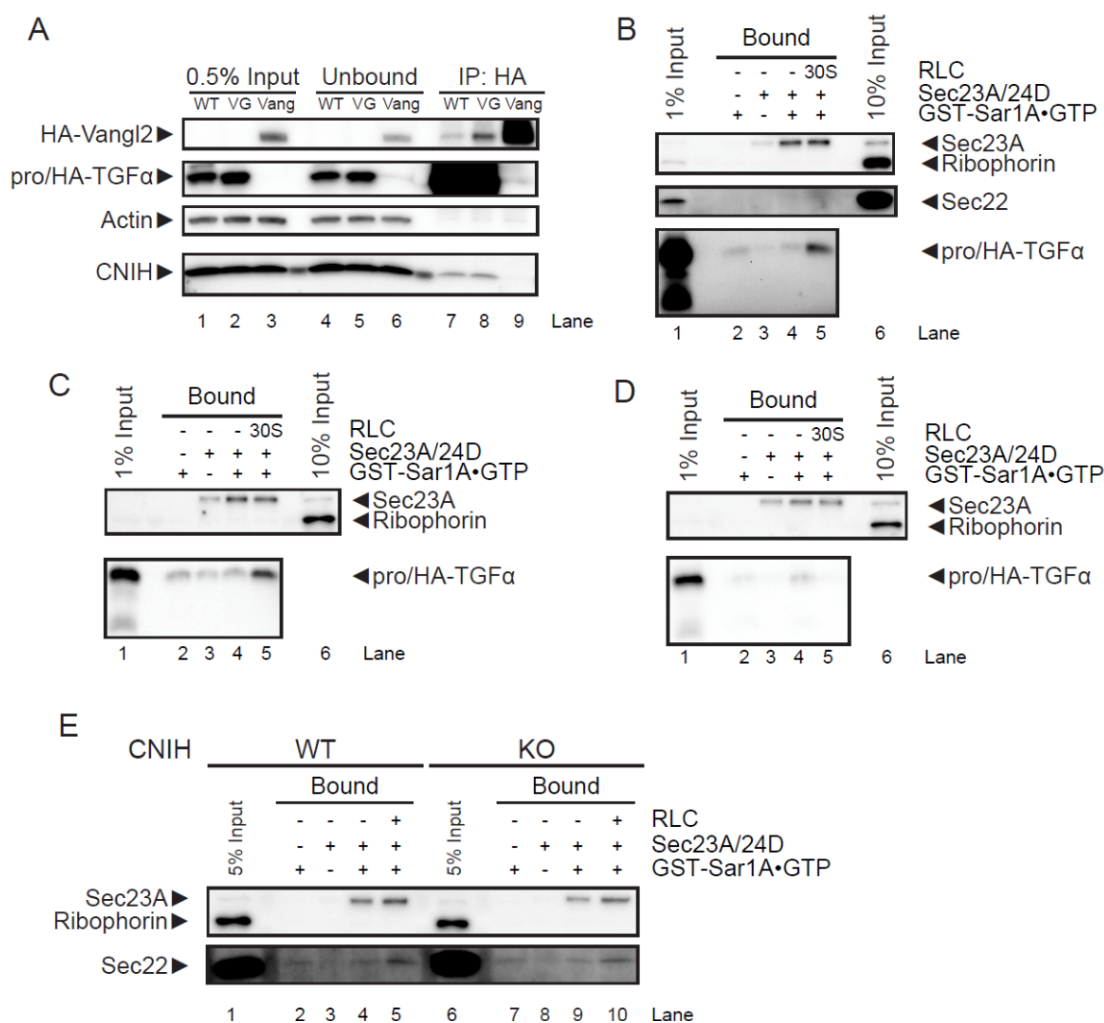

**Figure 5.** CNIH and cytosolic factor(s) required for proTGF $\alpha$  recruitment to the pre-budding complex. (A) HeLa cells were transiently transfected with plasmids expressing pro/HA-TGF $\alpha$  wild type (WT), V160G mutant (VG), or HA-Vangl2 (Vang) as indicated, and immunoprecipitation was performed using anti-HA antibodies. (B-E) Immunoblots of COPII recruitment assays. Recruitment of pro/HA-TGF $\alpha$  was examined using membranes prepared from wild type HeLa cells expressing proTGF $\alpha$  WT (B) or V160G (C), or using membranes prepared from CNIH KO HeLa cells expressing proTGF $\alpha$  WT (D). Recruitment of Sec22 was compared in HeLa wild type (WT) membranes or CNIH KO (KO) membranes (E).



Supplementary Material:

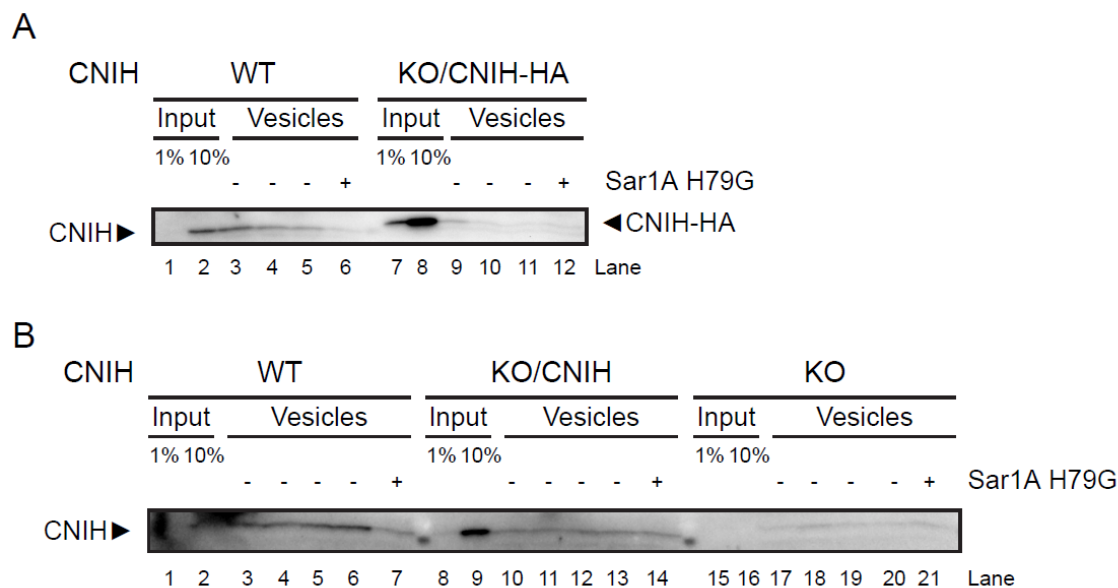

**Figure S1.** Overexpression of Cornichon-1 results in retention in the ER. (A and B) Immunoblots of in vitro budding reactions. Membranes were prepared as indicated either from wild type (WT) or CNIH KO (KO) HeLa cells. CNIH knockout cells were transiently transfected with plasmids expressing CNIH-HA (KO/CNIH-HA) or CNIH (KO/CNIH), and membranes were harvested 20h post transfection for use in in vitro budding reactions. Overexpression of CNIH-HA resulted in significantly decreased budding efficiency (A). This was not due to addition of the HA-tag as overexpression of CNIH also resulted in very inefficient CNIH budding (B).
